# Supplementary material for: Thermal rearrangement of optically active tetradeuterated 2-methoxymethyl-methylenecyclopropane and the bent bond/antiperiplanar hypothesis
Source: Royal Society of Chemistry journal article supplement (doi:10.1039/c9ob01030k), 2019-01-01
Supplement: c9ob01030k1.pdf [file c9ob01030k1.pdf]

**SUPPORTING INFORMATION**

**Thermal Rearrangement of Optically Active Tetradeuterated 2-methoxymethyl-methylenecyclopropane and the Bent Bond / Antiperiplanar Hypothesis**

*Ghislain Deslongchamps<sup>‡</sup> and Pierre Deslongchamps<sup>\*†</sup>*

<sup>\*†</sup> Département de Chimie, Université Laval, Québec, QC, G1V 0A6, Canada;

Email: [pierre.deslongchamps@chm.ulaval.ca](mailto:pierre.deslongchamps@chm.ulaval.ca)

<sup>‡</sup> Department of Chemistry, University of New Brunswick, P. O. Box 4400, Fredericton, NB, E3B 5A3, Canada

Email: [ghislain@unb.ca](mailto:ghislain@unb.ca)

**Figure SI-1** BBAH analysis for conrotatory cleavage of **1** with no inversion

**Figure SI-2** BBAH analysis for conrotatory cleavage of **1** with single inversion at C<sub>2</sub>

**Figure SI-3** BBAH analysis for conrotatory cleavage of **1** with single inversion at C<sub>3</sub>

**Figure SI-4** BBAH analysis for conrotatory cleavage of **1** with double inversion at C<sub>2</sub> and C<sub>3</sub>

**Table SI-1** BBAH analysis summary for disrotatory cleavage of **1-4** and **1'-4'**

**Table SI-2** BBAH analysis summary for conrotatory cleavage of **1-4** and **1'-4'**

**Table SI-3** XYZ coordinates for geometry optimized 2-methyl-1-methylenecyclopropane

**Table SI-4** XYZ coordinates for geometry optimized 1-ethylidenecyclopropane

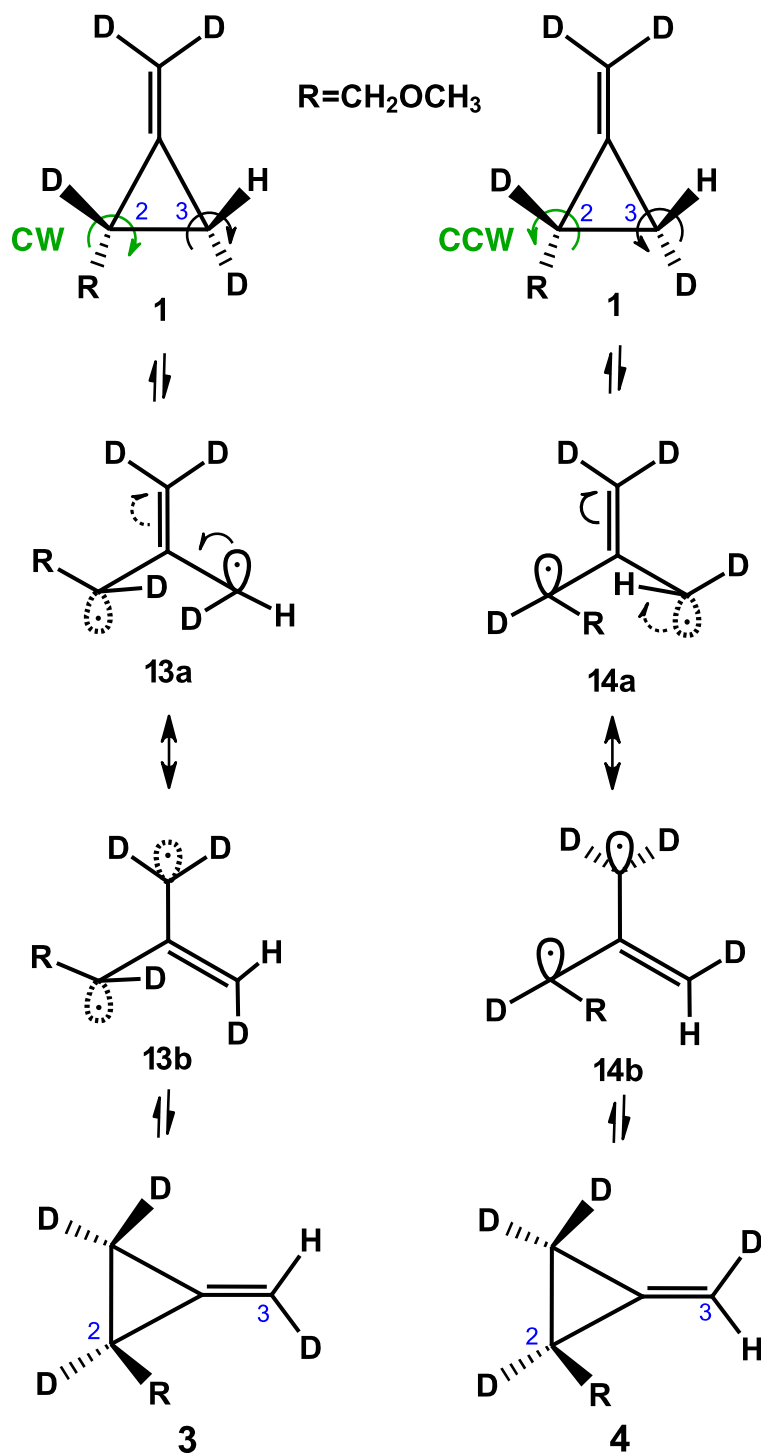

**Fig. SI-1.** Conrotatory cleavage of **1** with no inversion. Radical inversions shown in red. Rotational direction at  $\text{C}_2$  (CW/CCW) shown in green.

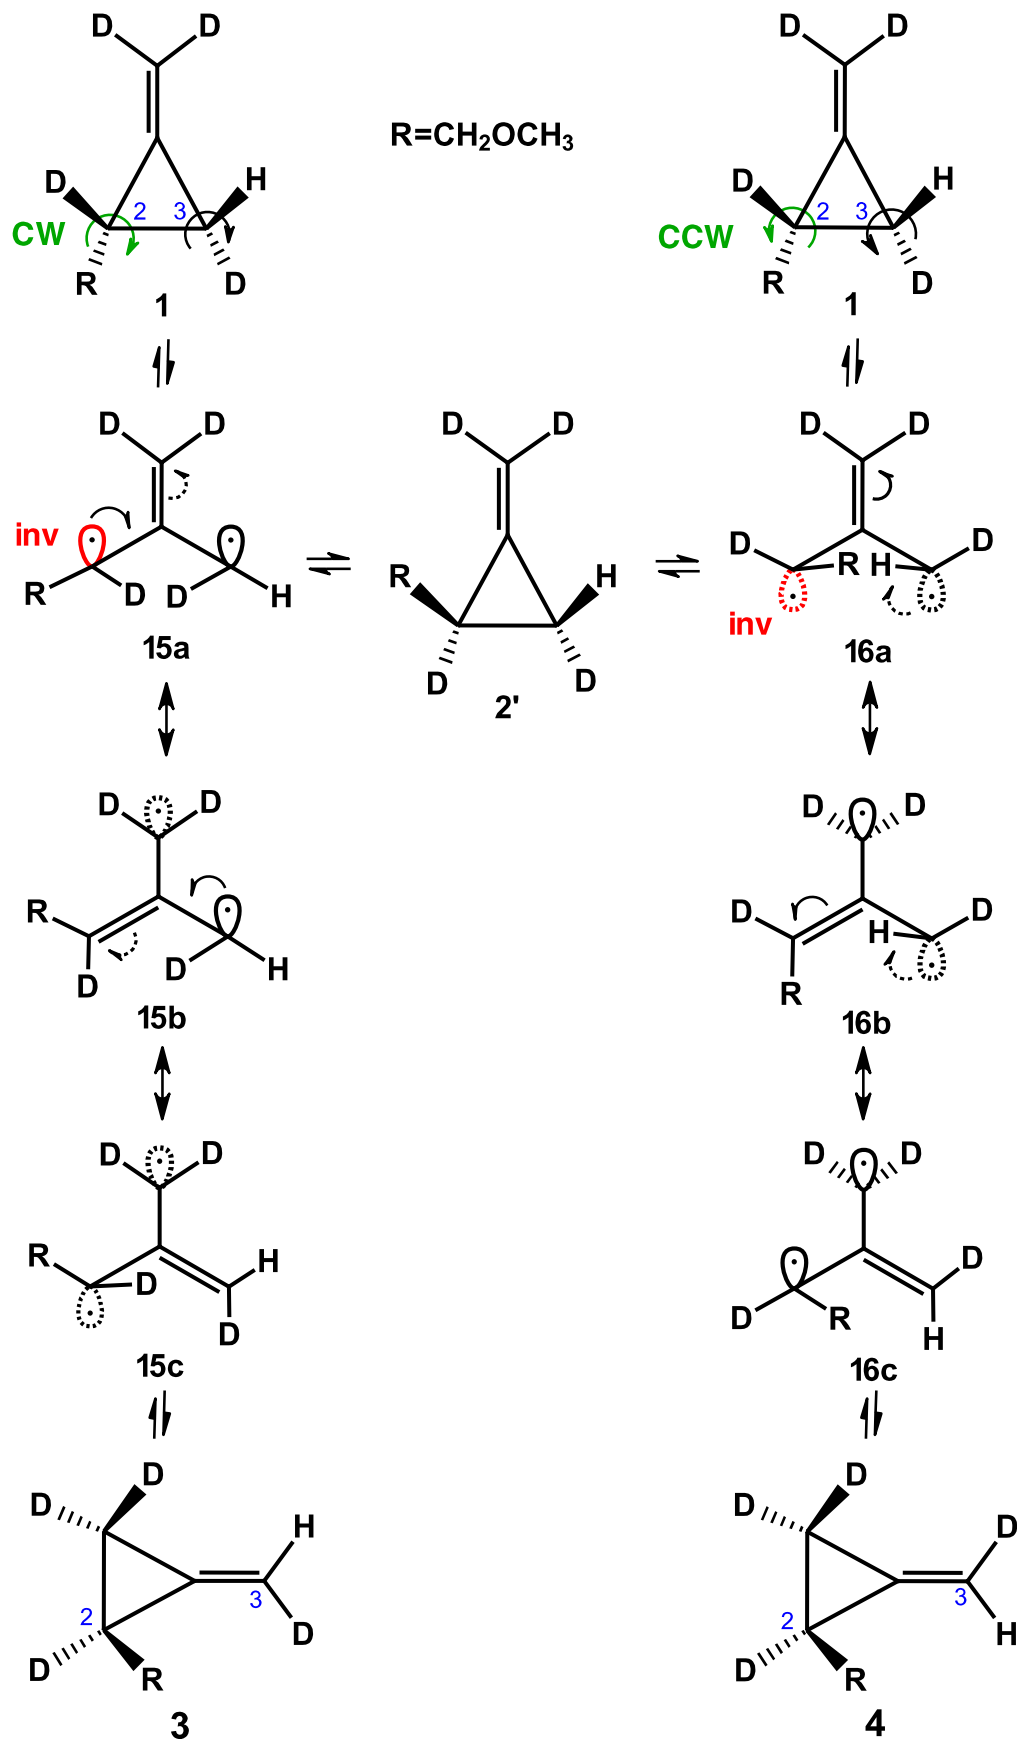

**Fig. SI-2.** Conrotatory cleavage of 1 with single inversion at C<sub>2</sub>. Radical inversions shown in red. Rotational direction at C<sub>2</sub> (CW/CCW) shown in green.

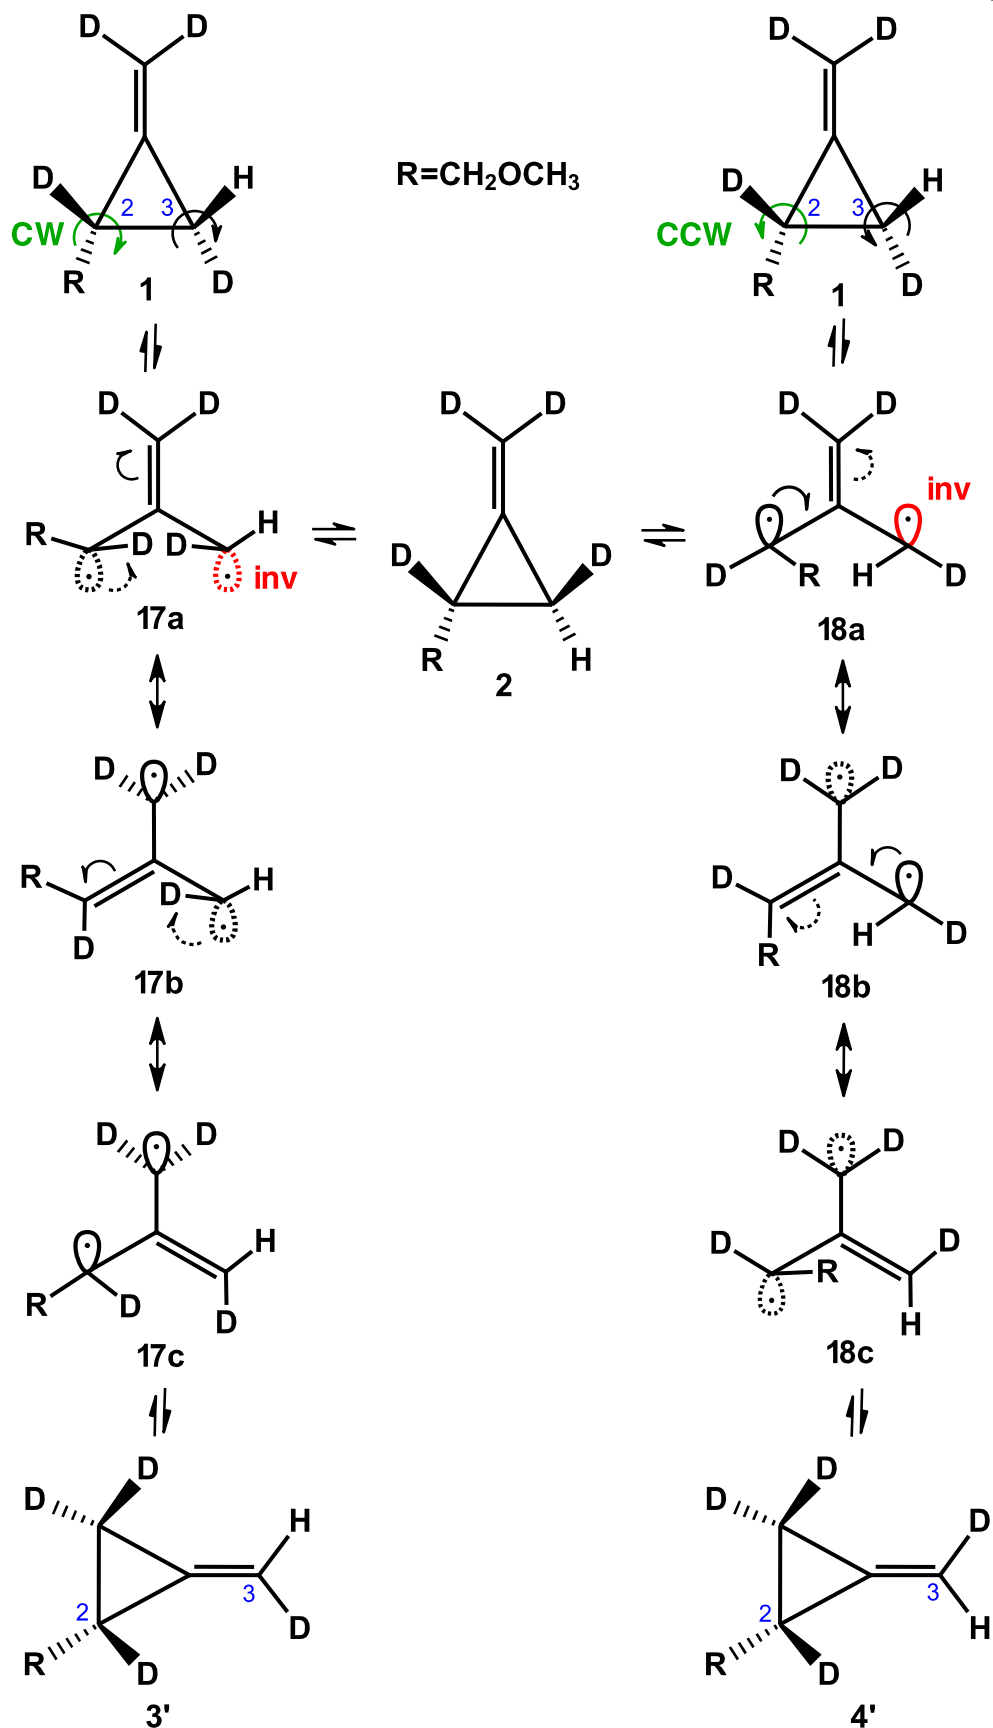

**Fig. SI-3.** Conrotatory cleavage of **1** with single inversion at  $C_3$ . Radical inversions shown in red. Rotational direction at  $C_2$  (CW/CCW) shown in green.

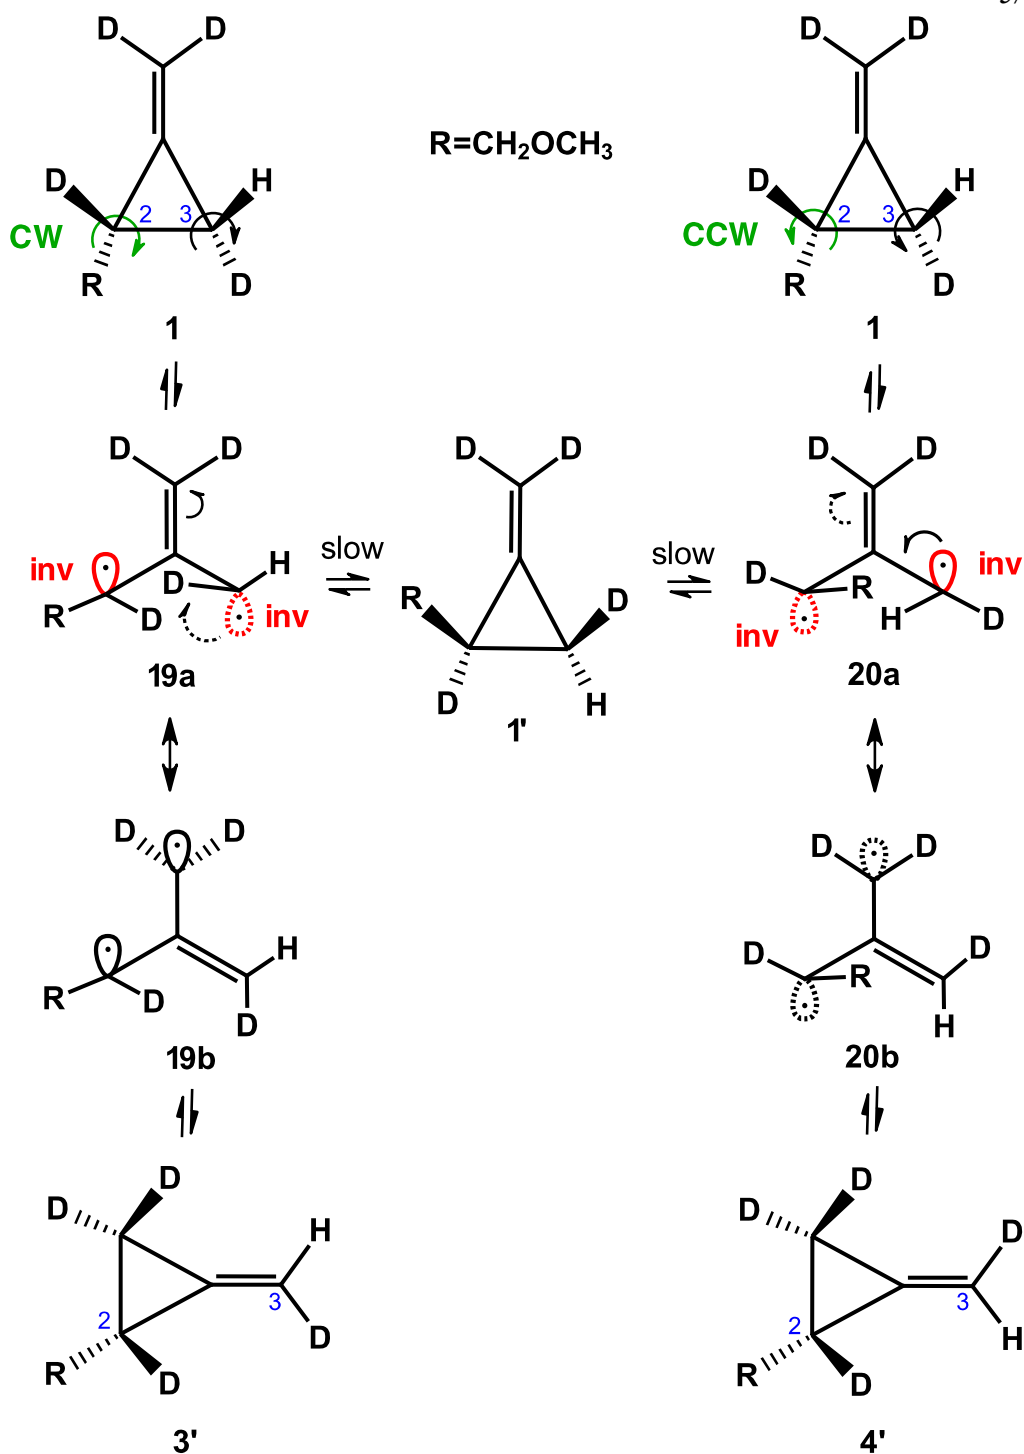

**Fig. SI-4.** Conrotatory cleavage of **1** with double inversion at  $C_2$  and  $C_3$ . Radical inversions shown in red. Rotational direction at  $C_2$  (CW/CCW) shown in green.

**Table SI-1.** BBAH analysis summary for disrotatory mode of cleavage of 1-4 and 1'-4'

| <b>Stereoisomer</b> | <b>Inversion</b>                  | <b>Products</b>   |
|---------------------|-----------------------------------|-------------------|
| <b>1</b>            | none                              | <b>3', 4', 1</b>  |
| "                   | C <sub>2</sub>                    | <b>3', 4', 2'</b> |
| "                   | C <sub>3</sub>                    | <b>3, 4, 2</b>    |
| "                   | C <sub>2</sub> and C <sub>3</sub> | <b>3, 4, 1'</b>   |
| <b>1'</b>           | none                              | <b>3, 4, 1'</b>   |
| "                   | C <sub>2</sub>                    | <b>3, 4, 2</b>    |
| "                   | C <sub>3</sub>                    | <b>3', 4', 2'</b> |
| "                   | C <sub>2</sub> and C <sub>3</sub> | <b>3', 4', 1</b>  |
| <b>2</b>            | none                              | <b>3', 4', 2</b>  |
| "                   | C <sub>2</sub>                    | <b>3', 4', 1'</b> |
| "                   | C <sub>3</sub>                    | <b>3, 4, 1</b>    |
| "                   | C <sub>2</sub> and C <sub>3</sub> | <b>3, 4, 2'</b>   |
| <b>2'</b>           | none                              | <b>3, 4, 2'</b>   |
| "                   | C <sub>2</sub>                    | <b>3, 4, 1</b>    |
| "                   | C <sub>3</sub>                    | <b>3', 4', 1'</b> |
| "                   | C <sub>2</sub> and C <sub>3</sub> | <b>3', 4', 2</b>  |
| <b>3</b>            | none                              | <b>1', 2', 3</b>  |
| "                   | C <sub>2</sub>                    | <b>1', 2', 3'</b> |
| "                   | C <sub>3</sub>                    | <b>1, 2, 3'</b>   |
| "                   | C <sub>2</sub> and C <sub>3</sub> | <b>1, 2, 3'</b>   |
| <b>3'</b>           | none                              | <b>1, 2, 3'</b>   |
| "                   | C <sub>2</sub>                    | <b>1, 2, 3</b>    |
| "                   | C <sub>3</sub>                    | <b>1', 2', 3'</b> |
| "                   | C <sub>2</sub> and C <sub>3</sub> | <b>1', 2', 3</b>  |
| <b>4</b>            | none                              | <b>1', 2', 4</b>  |
| "                   | C <sub>2</sub>                    | <b>1', 2', 4'</b> |
| "                   | C <sub>3</sub>                    | <b>1, 2, 4</b>    |
| "                   | C <sub>2</sub> and C <sub>3</sub> | <b>1, 2, 4'</b>   |
| <b>4'</b>           | none                              | <b>1, 2, 4'</b>   |
| "                   | C <sub>2</sub>                    | <b>1, 2, 4</b>    |
| "                   | C <sub>3</sub>                    | <b>1', 2', 4'</b> |
| "                   | C <sub>2</sub> and C <sub>3</sub> | <b>1', 2', 4</b>  |

**Table SI-2.** BBAH analysis summary for conrotatory mode of cleavage of **1-4** and **1'-4'**

| <b>Stereoisomer</b> | <b>Inversion</b>                  | <b>Products</b>   |
|---------------------|-----------------------------------|-------------------|
| <b>1</b>            | none                              | <b>3, 4, 1</b>    |
| "                   | C <sub>2</sub>                    | <b>3, 4, 2'</b>   |
| "                   | C <sub>3</sub>                    | <b>3', 4', 2</b>  |
| "                   | C <sub>2</sub> and C <sub>3</sub> | <b>3', 4', 1'</b> |
| <b>1'</b>           | none                              | <b>3', 4', 1'</b> |
| "                   | C <sub>2</sub>                    | <b>3', 4', 2</b>  |
| "                   | C <sub>3</sub>                    | <b>3, 4, 2'</b>   |
| "                   | C <sub>2</sub> and C <sub>3</sub> | <b>3, 4, 1</b>    |
| <b>2</b>            | none                              | <b>3, 4, 2</b>    |
| "                   | C <sub>2</sub>                    | <b>3, 4, 1'</b>   |
| "                   | C <sub>3</sub>                    | <b>3', 4', 1</b>  |
| "                   | C <sub>2</sub> and C <sub>3</sub> | <b>3', 4', 2'</b> |
| <b>2'</b>           | none                              | <b>3', 4', 2'</b> |
| "                   | C <sub>2</sub>                    | <b>3', 4', 1</b>  |
| "                   | C <sub>3</sub>                    | <b>3, 4, 1'</b>   |
| "                   | C <sub>2</sub> and C <sub>3</sub> | <b>3, 4, 2</b>    |
| <b>3</b>            | none                              | <b>1, 2, 3</b>    |
| "                   | C <sub>2</sub>                    | <b>1, 2, 3'</b>   |
| "                   | C <sub>3</sub>                    | <b>1', 2', 3</b>  |
| "                   | C <sub>2</sub> and C <sub>3</sub> | <b>1', 2', 3'</b> |
| <b>3'</b>           | none                              | <b>1', 2', 3'</b> |
| "                   | C <sub>2</sub>                    | <b>1', 2', 3</b>  |
| "                   | C <sub>3</sub>                    | <b>1, 2, 3'</b>   |
| "                   | C <sub>2</sub> and C <sub>3</sub> | <b>1, 2, 3</b>    |
| <b>4</b>            | none                              | <b>1, 2, 4</b>    |
| "                   | C <sub>2</sub>                    | <b>1, 2, 4'</b>   |
| "                   | C <sub>3</sub>                    | <b>1', 2', 4</b>  |
| "                   | C <sub>2</sub> and C <sub>3</sub> | <b>1', 2', 4'</b> |
| <b>4'</b>           | none                              | <b>1', 2', 4'</b> |
| "                   | C <sub>2</sub>                    | <b>1', 2', 4</b>  |
| "                   | C <sub>3</sub>                    | <b>1, 2, 4'</b>   |
| "                   | C <sub>2</sub> and C <sub>3</sub> | <b>1, 2, 4</b>    |

**Table SI-3.** XYZ coordinates for geometry optimized 2-methyl-1-methylenecyclopropane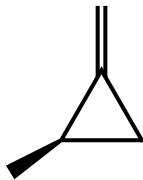

**-122544.86 kcal/mol** (G16,<sup>1</sup> wB97XD/Def2TZVPP)

| <b>Atom</b> | <b>X</b>  | <b>Y</b>  | <b>Z</b>  |
|-------------|-----------|-----------|-----------|
| C           | 0.761585  | 0.032436  | 0.066817  |
| C           | -0.630466 | 0.107508  | 0.505245  |
| H           | -0.788616 | 0.2178    | 1.57319   |
| C           | -1.711221 | -0.652474 | -0.223188 |
| H           | -2.679916 | -0.164212 | -0.106528 |
| H           | -1.796328 | -1.671076 | 0.15758   |
| H           | -1.485809 | -0.713912 | -1.288726 |
| C           | 0.063183  | 1.297357  | -0.168803 |
| H           | 0.314266  | 2.155372  | 0.442263  |
| H           | -0.234466 | 1.536472  | -1.183359 |
| C           | 1.854725  | -0.682199 | -0.069985 |
| H           | 2.74057   | -0.271275 | -0.538252 |
| H           | 1.90346   | -1.704941 | 0.283313  |



**Table SI-4.** XYZ coordinates for geometry optimized 1-ethylidenecyclopropane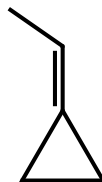

**-122545.84 kcal/mol** (G16,<sup>1</sup> wB97XD/Def2TZVPP)

| Atom | X         | Y         | Z         |
|------|-----------|-----------|-----------|
| C    | -0.312249 | -0.209715 | 0.000901  |
| C    | -1.238725 | 0.92189   | -0.000149 |
| H    | -1.363156 | 1.494071  | -0.911347 |
| H    | -1.365203 | 1.494036  | 0.910794  |
| C    | -1.736623 | -0.529319 | -0.000299 |
| H    | -2.186606 | -0.903569 | -0.911592 |
| H    | -2.188414 | -0.902711 | 0.910455  |
| C    | 0.934082  | -0.626633 | 0.0       |
| C    | 2.127813  | 0.276282  | -0.000109 |
| H    | 2.753229  | 0.097948  | -0.877789 |
| H    | 2.753729  | 0.097582  | 0.87716   |
| H    | 1.827793  | 1.323543  | 0.000257  |
| H    | 1.122838  | -1.695926 | -0.000262 |

<sup>1</sup> Gaussian 16, Revision B.01, Frisch, M. J.; Trucks, G. W.; Schlegel, H. B.; Scuseria, G. E.; Robb, M. A.; Cheeseman, J. R.; Scalmani, G.; Barone, V.; Petersson, G. A.; Nakatsuji, H.; Li, X.; Caricato, M.; Marenich, A. V.; Bloino, J.; Janesko, B. G.; Gomperts, R.; Mennucci, B.; Hratchian, H. P.; Ortiz, J. V.; Izmaylov, A. F.; Sonnenberg, J. L.; Williams-Young, D.; Ding, F.; Lipparini, F.; Egidi, F.; Goings, J.; Peng, B.; Petrone, A.; Henderson, T.; Ranasinghe, D.; Zakrzewski, V. G.; Gao, J.; Rega, N.; Zheng, G.; Liang, W.; Hada, M.; Ehara, M.; Toyota, K.; Fukuda, R.; Hasegawa, J.; Ishida, M.; Nakajima, T.; Honda, Y.; Kitao, O.; Nakai, H.; Vreven, T.; Throssell, K.; Montgomery, J. A., Jr.; Peralta, J. E.; Ogliaro, F.; Bearpark, M. J.; Heyd, J. J.; Brothers, E. N.; Kudin, K. N.; Staroverov, V. N.; Keith, T. A.; Kobayashi, R.; Normand, J.; Raghavachari, K.; Rendell, A. P.; Burant, J. C.; Iyengar, S. S.; Tomasi, J.; Cossi, M.; Millam, J. M.; Klene, M.; Adamo, C.; Cammi, R.; Ochterski, J. W.; Martin, R. L.; Morokuma, K.; Farkas, O.; Foresman, J. B.; Fox, D. J. Gaussian, Inc., Wallingford CT, 2016.
